# Supplementary material
Source: Springer Nature journal article supplement (https://www.springermedizin.de/resource/supplementary/13024_2009_86_MOESM2_ESM.pdf/9643362)

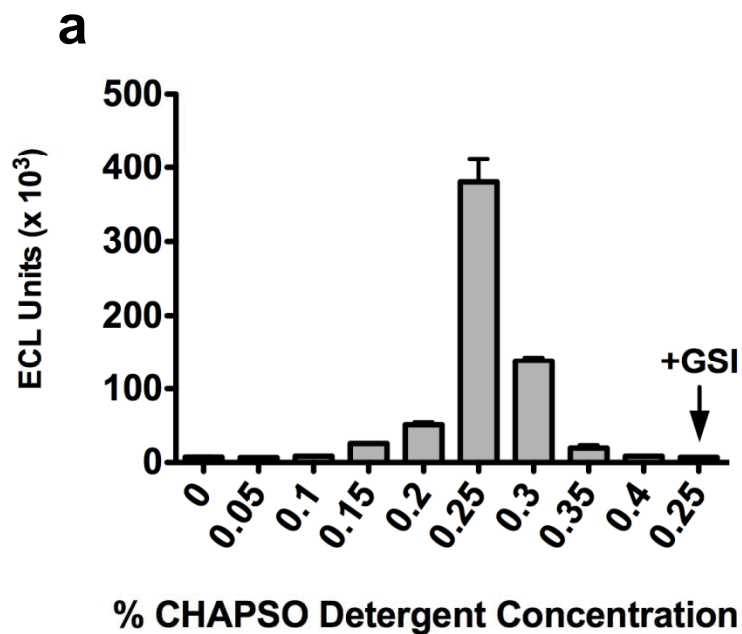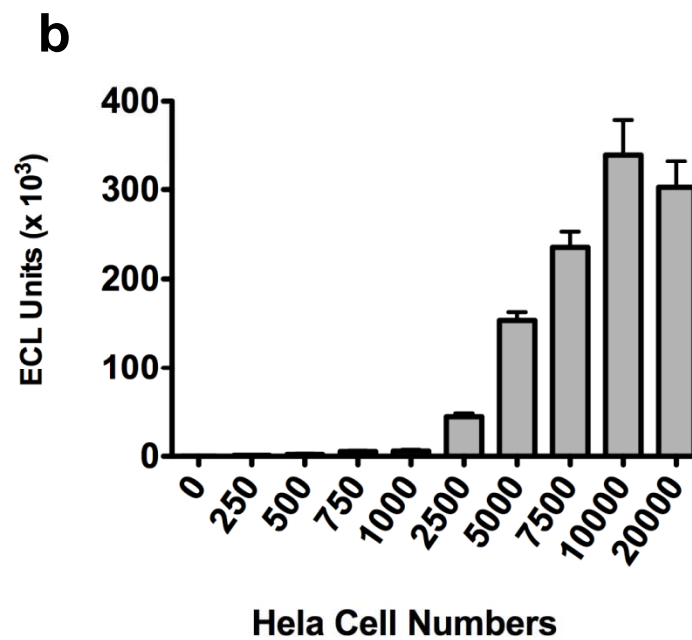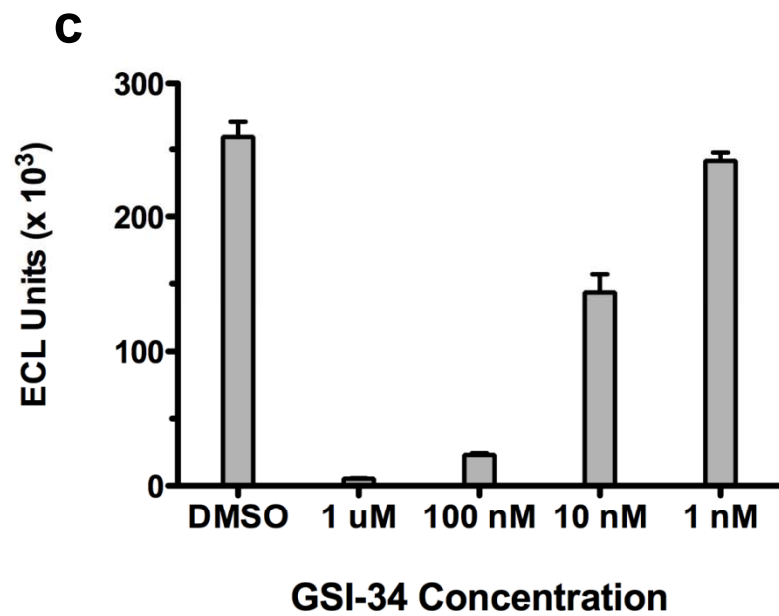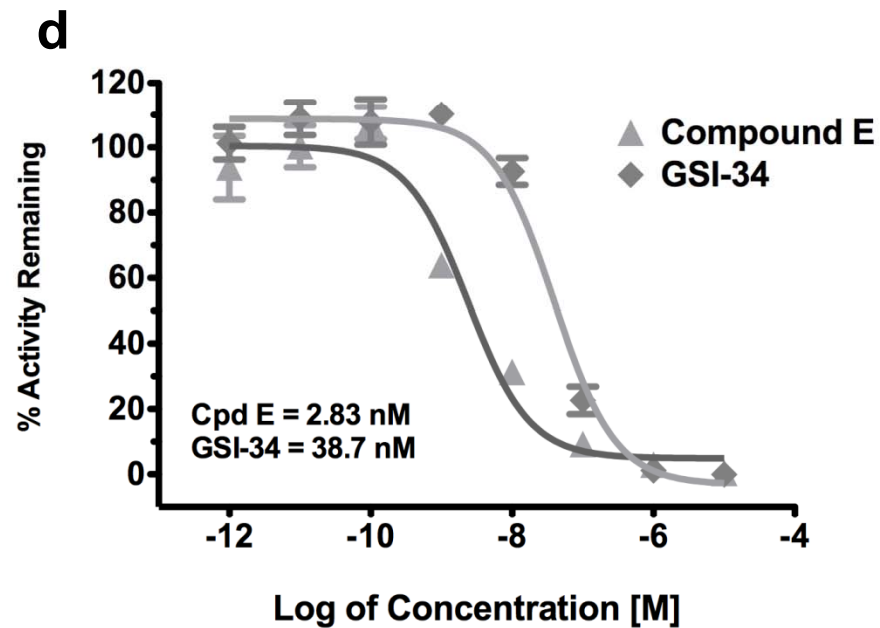

Supplement: MOESM2 [file 9643362]
